# Supplementary material for: Evaluating the consistency of forest disturbance datasets in continental USA
Source: Copernicus journal article supplement (doi:10.5194/bg-23-1291-2026), 2026-02-18
Supplement: Supplementary file 1 [file bg-23-1291-2026-supplement.pdf]

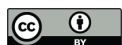

*Supplement of*

## **Evaluating the consistency of forest disturbance datasets in continental USA**

**Laura Eifler et al.**

*Correspondence to:* Laura Eifler ([laura.eifler@uni-leipzig.de](mailto:laura.eifler@uni-leipzig.de))

The copyright of individual parts of the supplement might differ from the article licence.

## S1 Tables

**Table S1.** DCA codes in IDS of different agent categories. The first two digits of the code describe the category code (10, 11, 12), the next three digits (here all 0) describe the agent code, which is normally more detailed (e.g. 001, 002), which was not needed for this study, except for *Drought* and *Wind*.

| DCA_CODE | DCA_NAME                         | New Name      | New Code |
|----------|----------------------------------|---------------|----------|
| 10000    | Miscellaneous insects and allies | Insects       | 1        |
| 11000    | Bark beetles                     | Insects       | 1        |
| 12000    | Defoliator                       | Insects       | 1        |
| 14000    | Sucking insects                  | Insects       | 1        |
| 15000    | Boring insects                   | Insects       | 1        |
| 16000    | Seed/cone/flower/fruit insects   | Insects       | 1        |
| 17000    | Gallmaker insects                | Insects       | 1        |
| 18000    | Predatory insects                | Insects       | 1        |
| 19000    | General diseases                 | Disease       | 2        |
| 20000    | Biotic damage                    | Other biotic  | 7        |
| 21000    | Root/butt disease                | Disease       | 2        |
| 22000    | Stem decays/cankers              | Disease       | 2        |
| 23000    | Parasitic/epiphytic plants       | Other biotic  | 7        |
| 24000    | Decline complexes/dieback        | Other biotic  | 7        |
| 25000    | Foliage and shoot diseases       | Disease       | 2        |
| 26000    | Stem rust                        | Disease       | 2        |
| 27000    | Broom rust                       | Disease       | 2        |
| 28000    | Boring insects - shoot and twig  | Insects       | 1        |
| 29000    | Root feeding insects             | Insects       | 1        |
| 30000    | Fire                             | Fire          | 3        |
| 41000    | Wild animals                     | Other biotic  | 7        |
| 42000    | Domestic animals                 | Other biotic  | 7        |
| 50000    | Abiotic damage                   | Other abiotic | 8        |
| 50003    | Drought                          | Drought       | 4        |
| 50013    | Wind                             | Wind          | 5        |
| 60000    | Competition                      | Other abiotic | 8        |
| 70000    | Human activities                 | Other abiotic | 8        |
| 80000    | Multi-damage (insect/disease)    | Multi damage  | 6        |
| 90000    | Unknown                          | Other         | 9        |

**Table S2.** Columns of interest of FIA condition data.

| Column name    | Meaning                              |
|----------------|--------------------------------------|
| PLT_CN         | Plot sequence number                 |
| COUNTYCD       | County Code                          |
| FORTYPECD      | Forest type code                     |
| COND_STATUS_CD | Condition status code                |
| DSTRBCD1       | Disturbance code 1                   |
| DSTRBYR1       | Disturbance year 1                   |
| DSTRBCD2       | Disturbance code 2                   |
| DSTRBYR2       | Disturbance year 2                   |
| DSTRBCD3       | Disturbance code 3                   |
| DSTRBYR3       | Disturbance year 3                   |
| OWNCD          | Owner class code                     |
| OWNGRPCD       | Owner group code                     |
| FORINDCD       | Private owner industrial status code |

**Table S3.** Columns of interest of FIA plot data.

| Column name | Meaning           |
|-------------|-------------------|
| CN          | Sequence number   |
| INVYR       | Inventory year    |
| STATECD     | State code        |
| PLOT        | Plot number       |
| MEASYEAR    | Measurement year  |
| MEASMON     | Measurement month |
| MEASDAY     | Measurement day   |
| LAT         | Latitude          |
| LON         | Longitude         |

**Table S4.** Columns of interest of FIA tree data.

| Column name      | Meaning                     |
|------------------|-----------------------------|
| PLT_CN           | Plot sequence number        |
| MORTYR           | Mortality year              |
| AGENTCD          | Cause of death (agent) code |
| DAMAGE_AGENT_CD1 | Damage agent code 1         |
| DAMAGE_AGENT_CD2 | Damage agent code 2         |
| DAMTYP1          | Damage type 1               |
| DAMSEV1          | Damage severity 1           |
| DAMLOC2          | Damage location 2           |
| DAMTYP2          | Damage type 2               |
| DAMSEV2          | Damage severity 2           |

**Table S5.** Agent coding mapping for ranges FIA agent categories based on IDS new coding system. The ranges of FIA codes are based on the information of agent code (*AGENTCD*) and disturbance code (*DSTRBCDI*).

| Agent FIA Name                         | Agent FIA Code (Range)     | New Name      | New Code |
|----------------------------------------|----------------------------|---------------|----------|
| No visible disturbance                 | 0                          | No data       | 0        |
| Insect                                 | 10 to 19                   | Insects       | 1        |
| Disease                                | 20 to 29                   | Disease       | 2        |
| Fire                                   | 30 to 39                   | Fire          | 3        |
| Animal                                 | 40 to 49                   | Other biotic  | 7        |
| Weather                                | 50 to 59, except 52 and 54 | Other abiotic | 8        |
| Wind                                   | 52                         | Wind          | 5        |
| Drought                                | 54                         | Drought       | 4        |
| Vegetation (suppression, competition)  | 60 to 69                   | Other         | 9        |
| Unknown (other)                        | 70 to 79                   | Other         | 9        |
| Silvicultural or landcleaning activity | 80 to 89                   | Other         | 9        |
| Other                                  | ≥ 90                       | Other         | 9        |

**Table S6.** Agent coding mapping for NAFD agent categories based on the new coding system.

| NAFD Type Name | NAFD Type Code | New Name     | New Code | Explanation                                                                                          |
|----------------|----------------|--------------|----------|------------------------------------------------------------------------------------------------------|
| Removal        | 101            | Other        | 9        | All mechanical clearings within six years of time series observations                                |
| Fire           | 102            | Fire         | 3        | Fire                                                                                                 |
| Other          | 103            | Other        | 9        | -                                                                                                    |
| Stress         | 104            | Other biotic | 7        | Events resulting in slow gradual loss of forest canopy, including insect damage, drought and disease |
| Wind           | 105            | Wind         | 5        | Wind                                                                                                 |
| Conversion     | 107            | Other        | 9        | Forest clearing followed by confirmed transition to a different land cover or use                    |
